# Supplementary material for: A Mixture of Persistent Organic Pollutants and Perfluorooctanesulfonic Acid Induces Similar Behavioural Responses, but Different Gene Expression Profiles in Zebrafish Larvae
Source: PubMed Central journal article supplement (PMC5343827; doi:10.3390/ijms18020291), 2017-01-29
Supplement: ijms-18-00291-s001.pdf [file ijms-18-00291-s001.pdf]

# Supplementary Materials: A Mixture of Persistent Organic Pollutants and Perfluorooctanesulfonic Acid Induce Similar Behavioural Responses, but Different Gene Expression Profiles in Zebrafish Larvae

Abdolrahman Khezri, Thomas W. K. Fraser, Rasoul Nourizadeh-Lillabadi, Jorke H. Kamstra, Vidar Berg, Karin E. Zimmer and Erik Ropstad

**Table S1.** The composition and concentrations of chemicals in the persistent organic pollutant (POP) mixture. The value reflect the concentrations equal to 1× the mean human plasma level. (Pf) Perfluorinated mixture; (Br) Brominated mixture; (Cl) Chlorinated mixture; (Pf + Br) binary mixture of perfluorinated and brominated compounds; (Pf + Cl) binary mixture of perfluorinated and chlorinated compounds; (Br + Cl) binary mixture of brominated and chlorinated compounds. The table is adapted from [67].

| Compounds                                     | Concentration (nM) |        |       |       |         |         |         |
|-----------------------------------------------|--------------------|--------|-------|-------|---------|---------|---------|
|                                               | Total              | Pf     | Br    | Cl    | Pf + Br | Pf + Cl | Br + Cl |
| <b>Perfluorinated compounds (PFCs)</b>        |                    |        |       |       |         |         |         |
| PFOA                                          | 10.923             | 10.923 |       |       | 10.923  | 10.923  |         |
| PFOS                                          | 54.801             | 54.801 |       |       | 54.801  | 54.801  |         |
| PFDA                                          | 0.962              | 0.962  |       |       | 0.962   | 0.962   |         |
| PFNA                                          | 1.723              | 1.723  |       |       | 1.723   | 1.723   |         |
| PFHxS                                         | 7.873              | 7.873  |       |       | 7.873   | 7.873   |         |
| PFUnDA                                        | 0.990              | 0.990  |       |       | 0.990   | 0.990   |         |
| <b>Polybrominated diphenyl ethers (PBDEs)</b> |                    |        |       |       |         |         |         |
| BDE-47                                        | 0.018              |        | 0.018 |       | 0.018   |         | 0.018   |
| BDE-99                                        | 0.007              |        | 0.007 |       | 0.007   |         | 0.007   |
| BDE-100                                       | 0.003              |        | 0.003 |       | 0.003   |         | 0.003   |
| BDE-153                                       | 0.001              |        | 0.001 |       | 0.001   |         | 0.001   |
| BDE-154                                       | 0.003              |        | 0.003 |       | 0.003   |         | 0.003   |
| BDE-209                                       | 0.011              |        | 0.011 |       | 0.011   |         | 0.011   |
| HBCD                                          | 0.038              |        | 0.038 |       | 0.038   |         | 0.038   |
| <b>Chlorinated compounds (CLCs) including</b> |                    |        |       |       |         |         |         |
| <b>Polychlorinated biphenyls (PCBs)</b>       |                    |        |       |       |         |         |         |
| PCB 28                                        | 0.050              |        |       | 0.050 |         | 0.050   | 0.050   |
| PCB 52                                        | 0.034              |        |       | 0.034 |         | 0.034   | 0.034   |
| PCB 101                                       | 0.024              |        |       | 0.024 |         | 0.024   | 0.024   |
| PCB 118                                       | 0.196              |        |       | 0.196 |         | 0.196   | 0.196   |
| PCB 138                                       | 0.615              |        |       | 0.615 |         | 0.615   | 0.615   |
| PCB 153                                       | 1.003              |        |       | 1.003 |         | 1.003   | 1.003   |
| PCB 180                                       | 0.490              |        |       | 0.490 |         | 0.490   | 0.490   |
| <b>Other organochlorines</b>                  |                    |        |       |       |         |         |         |
| p,p'-DDE                                      | 1.578              |        |       | 1.578 |         | 1.578   | 1.578   |
| HCB                                           | 0.410              |        |       | 0.410 |         | 0.410   | 0.410   |
| α-chlordane                                   | 0.026              |        |       | 0.026 |         | 0.026   | 0.026   |
| Oxy-chlordane                                 | 0.051              |        |       | 0.051 |         | 0.051   | 0.051   |
| Trans-nonachlor                               | 0.092              |        |       | 0.092 |         | 0.092   | 0.092   |
| α-HCH                                         | 0.020              |        |       | 0.020 |         | 0.020   | 0.020   |
| β-HCH                                         | 0.182              |        |       | 0.182 |         | 0.182   | 0.182   |
| γ-HCH (Lindane)                               | 0.020              |        |       | 0.020 |         | 0.020   | 0.020   |
| Dieldrin                                      | 0.063              |        |       | 0.063 |         | 0.063   | 0.063   |

Table S2. Primer sequences for qPCR.

| Gene           | Accession Number | Sequence                                                    | PCR Product Size |
|----------------|------------------|-------------------------------------------------------------|------------------|
| <i>Bactin</i>  | FJ_915059.1      | F: CGAGCAGGAGATGGGAAC<br>R: CAACGGAAACGCTCATTGC             | 101              |
| <i>Hprt</i>    | NM_212986.1      | F: CAGCGATGAGGAGCAAGGTTATG<br>R: GTCCATGATGAGCCCGTGAGG      | 102              |
| <i>Ef1α</i>    | AM_422110.2      | F: TTGAGAAGAAAATCGGTGGTGCTG<br>R: GGAACGGTGTGATTGAGGGAAATTC | 90               |
| <i>Rps18</i>   | NM_173234.1      | F: CATCCCAGAGAAGTTTCAGCACATC<br>R: CGCCTTCCAACACCCTTAATAGC  | 104              |
| <i>Hmbs</i>    | NM_201154.1      | F: GTGTGTGGAATTGGACAACAAAGTG<br>R: CGAGGGCTGATGATGAGATATTGC | 91               |
| <i>th1</i>     | NM_131149.1      | F: TGGATCAGGATCACCCAGGA<br>R: GTAGACCTCCCGCCATGTTC          | 149              |
| <i>th2</i>     | NM_001001829.1   | F: CGTTCCGGGTTTTCCAGTGT<br>R: CGAGACGAGTCCAATCTGTGAA        | 152              |
| <i>manf</i>    | NM_001076629     | F: AGAGTGTGAAGTCTGTGTGGG<br>R: CGCTGTCAAACCTTGACGTTGT       | 77               |
| <i>hdc</i>     | NM_001102593.1   | F: CTGGGCTCCACTGGTGTG<br>R: CTTGGACGGTTGAAGACGA             | 141              |
| <i>hrh1</i>    | NM_001042731.1   | F: CGACCTCCACATGTTACCA<br>R: CGTTGCAGAGCGGGTAAATG           | 77               |
| <i>crhb</i>    | NM_001007379.1   | F: CAATTACGCACAGATTCTCCTCG<br>R: GAAGTACTCCTCCCCAAGC        | 197              |
| <i>bdnf</i>    | NM_001308649.1   | F: GGACACTTTCGAGCAGGTCA<br>R: CTCAAAGGCACTTGGTTGC           | 178              |
| <i>nr4a2b</i>  | NM_001002406.1   | F: CGTACAGATCCAACCTGCCA<br>R: TATGGTGAGAGCGGCTATGC          | 194              |
| <i>iphn3.1</i> | XM_005170940.2   | F: GAACAGCTCAGCGACTCTCA<br>R: TGTAGGAGGCTTGGGTGTG           | 161              |
| <i>per1b</i>   | NM_212439.2      | F: AACGCTAAAGGTCCGCTCTGT<br>R: CTTGTCCCCAACATGGACGA         | 141              |
| <i>ache</i>    | NM_131846.1      | F: CTCCAGGAACACTAGGCTGG<br>R: TACACAGCACCATGCGAGTT          | 73               |
| <i>gabra1</i>  | NM_001077326.1   | F: AGCCATCCTGATTTTCGAGGG<br>R: AGCTTTTTCCAGCCAGAGCA         | 121              |
| <i>chrna1</i>  | NM_131445.1      | F: CTCGACCGACCTCTGGAAAC<br>R: GCAGGTCGAAGGGAAAGTGA          | 176              |
| <i>chrna7</i>  | NM_201219.2      | F: GAGTGGGACCTTGTGGAAGT<br>R: TCCGCATCACCACCGTAAAA          | 100              |
| <i>gad2</i>    | NM_001017708.2   | F: ATGGGCTAACCTCCACTGCC<br>R: CGAGCCAGTAGCATGGCATA          | 184              |
| <i>gad1b</i>   | NM_194419.1      | F: CTGTGACACCTGTGACTCCGTA<br>R: GTGTGCAACCCCGTACCAC         | 181              |
| <i>gabbr1a</i> | XM_689405.6      | F: AACAAACCGGAGCGACATTCT<br>R: CAGATTCCACATTTCGCGCTG        | 189              |
| <i>htr1aa</i>  | NM_001123321.1   | F: CTACTIONACTTTCCGGGGCGT<br>R: CACCGCCAAGCATTATCCG         | 145              |
| <i>sertb</i>   | NM_001177459.1   | F: ACCCTGCCATATGTTGTGCT<br>R: AGCTGCATCTACCATAACGC          | 135              |
| <i>ryr3</i>    | XM_009294773.1   | F: GAGGCAACGTTCTTGTGCAG<br>R: CCGTCCTTTCACGCTGATTG          | 191              |
| <i>dat</i>     | NM_131755.1      | F: TCAAGTTCCTGCACAAACATCG<br>R: CACAAATTTCCAGCACAGTCTCC     | 268              |
